# Supplementary material for: Structural and functional insights into the bona fide catalytic state of Streptococcus pyogenes Cas9 HNH nuclease domain
Source: eLife. 2019 Jul 30;8:e46500. doi: 10.7554/eLife.46500 (PMC6706240; doi:10.7554/eLife.46500)
Supplement: Figure 1—source data 1. [file elife-46500-fig1-data1.xlsx]

## Sheet: Graphs
Quantification of plasmid cleavage products
SpyCas9-WT
Time	Nick	Nick-SEM	Linear	Linear-SEM	Total activity	Total activity-SEM
0	0.3008	0.0343395	0.023786	0.00337131	0.324586	0.0376905
0.15	0.380413	0.0548673	0.584781	0.0557039	0.965194	0.00822669
0.3	0.336805	0.00789364	0.625118	0.00746773	0.961924	0.0077497
1	0.241198	0.00831897	0.727568	0.0125872	0.968766	0.00615173
2.5	0.167008	0.00584191	0.801611	0.0104572	0.968619	0.00472814
5	0.143336	0.00549768	0.830643	0.00617055	0.973979	0.00467186
7.5	0.13181	0.00824696	0.84323	0.0113091	0.97504	0.00306657
10	0.122512	0.0128337	0.860429	0.0160988	0.982942	0.00411693
20	0.137776	0.0159205	0.84446	0.0212629	0.982235	0.00559161
30	0.104932	0.0119614	0.881337	0.0155111	0.986269	0.00396275
45	0.0941454	0.0131296	0.893882	0.0151767	0.988028	0.00219709
60	0.0850397	0.0139047	0.912729	0.0139776	0.997769	0.000345037
SpyCas9-D861A
Time	Nick	Nick-SEM	Linear	Linear-SEM	Total activity	Total activity-SEM
0	0.263861	0.025206	0.0162071	0.00369637	0.280068	0.0278281
0.15	0.580459	0.0231938	0.0798356	0.00437981	0.660294	0.0202136
0.3	0.588531	0.00943132	0.10047	0.0124048	0.689001	0.0193492
1	0.600816	0.0122113	0.174025	0.0227984	0.774841	0.0173869
2.5	0.520045	0.0104073	0.37839	0.0113559	0.898435	0.000948947
5	0.36823	0.00184867	0.580115	0.00421703	0.948344	0.00259115
7.5	0.27144	0.0239349	0.69098	0.0274852	0.96242	0.00355462
10	0.231881	0.00603705	0.734458	0.0079798	0.966339	0.00195437
20	0.180857	0.0200403	0.787995	0.0235147	0.968852	0.00359052
30	0.125558	0.0212901	0.847076	0.0259997	0.972634	0.00489991
45	0.1021	0.0233922	0.876748	0.0303037	0.978848	0.00694451
60	0.108754	0.0192331	0.873989	0.0207649	0.982743	0.00165998
SpyCas9-N863A
Time	Nick	Nick-SEM	Linear	Linear-SEM	Total activity	Total activity-SEM
0	0.239394	0.0338999	0.0181257	0.00398968	0.25752	0.037724
0.15	0.37616	0.0260401	0.0137313	0.00217888	0.389892	0.0281191
0.3	0.406793	0.0211495	0.0108957	0.00175525	0.417688	0.022899
1	0.487587	0.0311014	0.0124558	0.00148439	0.500042	0.0296174
2.5	0.611684	0.0429422	0.0156959	0.00391298	0.62738	0.042089
5	0.71722	0.0407506	0.0124519	0.00100813	0.729672	0.0404523
7.5	0.776608	0.0210279	0.0111741	0.00205711	0.787782	0.0197812
10	0.821648	0.0119005	0.0114898	0.00198994	0.833138	0.0115814
20	0.858622	0.0159427	0.0119789	0.00226282	0.870601	0.0167931
30	0.889706	0.0173962	0.0175628	0.00348998	0.907269	0.0165588
45	0.914801	0.00700973	0.0161912	0.00369517	0.930993	0.00574584
60	0.912837	0.010695	0.0217996	0.00451805	0.934637	0.0108726

## Sheet: SpyCas9-WT
Replication 1
Activity_WTP_WTS_15s-60m_5Mgcl2_rep1
	Nick intensity	Linear intensity	SC intensity	Total intensity	Nick	Linear	Nick+linear	SC
Control	3409.45	283.021	5615.49	9307.96	0.366294	0.0304064	0.3967	0.6033
15 sec	8807.88	10964.9	421.435	20194.2	0.436159	0.542972	0.979131	0.0208691
30 sec	6619.59	12339.2	452.142	19411	0.341023	0.635684	0.976707	0.0232931
1 min	4341.64	13735.1	352.607	18429.4	0.235583	0.745284	0.980867	0.0191329
2.5 min	2603.4	13784.1	372.849	16760.4	0.155331	0.822424	0.977754	0.0222459
5 min	2271.28	14020.5	341.192	16633	0.136552	0.842935	0.979487	0.0205129
7.5 min	1879.2	13719.8	319.435	15918.5	0.118052	0.861881	0.979933	0.0200669
10 min	1662.03	15164.5	212.607	17039.1	0.0975421	0.88998	0.987522	0.0124776
15 min	1867.98	15584.4	119.364	17571.7	0.106306	0.886901	0.993207	0.00679296
30 min	1464.2	16100.6	155.95	17720.7	0.0826266	0.908573	0.9912	0.00880042
45 min	1247.84	15699.1	131.536	17078.5	0.073065	0.919233	0.992298	0.00770185
60 min	921.648	15142.5	34.121	16098.3	0.0572514	0.940629	0.99788	0.00211955
Replication 2
Activity_WTP_WTS_15s-60m_5Mgcl2_rep2
	Nick intensity	Linear intensity	SC intensity	Total intensity	Nick	Linear	Nick+linear	SC
Control	3068.57	231.607	7430.8	10731	0.285954	0.021583	0.307537	0.692463
15 sec	4674.88	12005.1	590.678	17270.7	0.270683	0.695116	0.965799	0.0342012
30 sec	5680.12	11111.8	874.506	17666.4	0.321521	0.628978	0.950499	0.0495011
1 min	3150.71	10038.3	483.435	13672.5	0.230442	0.7342	0.964642	0.0353583
2.5 min	2900.81	13283	566.678	16750.5	0.173178	0.792992	0.966169	0.0338305
5 min	2749.35	14681.4	396.435	17827.2	0.154222	0.82354	0.977762	0.0222376
7.5 min	2294.81	14823.5	424.607	17543	0.130811	0.844985	0.975796	0.0242038
10 min	2232.4	14728.7	230.778	17191.8	0.129852	0.856724	0.986576	0.0134237
15 min	2536.57	14025.3	426.849	16988.7	0.149309	0.825565	0.974875	0.0251254
30 min	1633.43	13245.1	162.778	15041.3	0.108596	0.880582	0.989178	0.010822
45 min	1241.31	12200.6	179.95	13621.9	0.0911257	0.895664	0.98679	0.0132103
60 min	1739.62	15981.8	30.121	17751.6	0.097998	0.900305	0.998303	0.00169681
Replication 3
Activity_WTP_WTS_15s-60m_5Mgcl2_rep3
	Nick intensity	Linear intensity	SC intensity	Total intensity	Nick	Linear	Nick+linear	SC
Control	3417.45	264.607	9979.51	13661.6	0.25015	0.0193687	0.269519	0.730481
15 sec	7550.54	8973.37	857.749	17381.7	0.434397	0.516255	0.950652	0.0493479
30 sec	6268.83	11005	746.678	18020.5	0.347872	0.610694	0.958565	0.0414348
1 min	4618.59	12609.8	703.092	17931.5	0.257569	0.703221	0.96079	0.03921
2.5 min	2924.4	13381.8	645.263	16951.4	0.172516	0.789419	0.961935	0.0380654
5 min	2537.4	15043	643.506	18223.9	0.139234	0.825455	0.964689	0.0353111
7.5 min	2732.64	15340.9	570.678	18644.2	0.146568	0.822823	0.969391	0.0306088
10 min	2904.69	17298.1	523.849	20726.6	0.140143	0.834583	0.974726	0.0252742
15 min	3153.69	16415.5	427.435	19996.6	0.157711	0.820913	0.978625	0.0213754
30 min	2450.15	16949.7	427.678	19827.6	0.123573	0.854857	0.97843	0.0215699
45 min	2569.28	18833	326.021	21728.3	0.118245	0.86675	0.984996	0.0150044
60 min	1962.96	17635.7	56.536	19655.2	0.0998697	0.897254	0.997124	0.00287638
				Time	Nick	Linear	Total activity
				0	0.3008	0.023786	0.324586
				0.15	0.380413	0.584781	0.965194
				0.3	0.336805	0.625118	0.961924
				1	0.241198	0.727568	0.968766
				2.5	0.167008	0.801611	0.968619
				5	0.143336	0.830643	0.973979
				7.5	0.13181	0.84323	0.97504
				10	0.122512	0.860429	0.982942
				20	0.137776	0.84446	0.982235
				30	0.104932	0.881337	0.986269
				45	0.0941454	0.893882	0.988028
				60	0.0850397	0.912729	0.997769
				STD
				Control	0.0594778	0.00583928	0.0652819
				15 sec	0.095033	0.096482	0.014249
				30 sec	0.0136722	0.0129345	0.0134229
				1 min	0.0144089	0.0218017	0.0106551
				2.5 min	0.0101185	0.0181123	0.00818937
				5 min	0.00952227	0.0106877	0.00809189
				7.5 min	0.0142841	0.0195879	0.00531146
				10 min	0.0222286	0.027884	0.00713073
				20 min	0.0275751	0.0368284	0.00968495
				30 min	0.0207177	0.0268659	0.00686369
				45 min	0.0227411	0.0262868	0.00380548
				60 min	0.0240836	0.0242099	0.000597622
				SEM
				Control	0.0343395	0.00337131	0.0376905
				15 sec	0.0548673	0.0557039	0.00822669
				30 sec	0.00789364	0.00746773	0.0077497
				1 min	0.00831897	0.0125872	0.00615173
				2.5 min	0.00584191	0.0104572	0.00472814
				5 min	0.00549768	0.00617055	0.00467186
				7.5 min	0.00824696	0.0113091	0.00306657
				10 min	0.0128337	0.0160988	0.00411693
				20 min	0.0159205	0.0212629	0.00559161
				30 min	0.0119614	0.0155111	0.00396275
				45 min	0.0131296	0.0151767	0.00219709
				60 min	0.0139047	0.0139776	0.000345037

## Sheet: SpyCas9-D861A
Replication 1
Activity_D861A_WTS_15s-60m_5Mgcl2_rep1-nextday
Time	Nick intensity	Linear intensity	SC intensity	Total intensity	Nick	Linear	Nick+linear	SC
0	3231.64	148.364	11616.7	14996.7	0.215491	0.00989314	0.225384	0.774616
15 sec	10640.9	1241.84	5569.1	17451.8	0.609729	0.0711583	0.680887	0.319113
30 sec	10859.7	1424.91	6536.75	18821.3	0.576988	0.0757072	0.652695	0.347305
1 min	11718.2	2437.76	4773.02	18929	0.619062	0.128784	0.747846	0.252154
2.5 min	13642.4	9165.51	2621.62	25429.5	0.536478	0.360428	0.896906	0.103094
5 min	9315.29	15014.6	1222.82	25552.7	0.364551	0.587594	0.952145	0.0478548
7.5 min	5255.02	17533.4	716.506	23505	0.223571	0.745946	0.969517	0.0304832
10 min	5044.36	17220.7	683.092	22948.1	0.219816	0.750417	0.970233	0.0297668
15 min	2756.73	16350.5	473.849	19581.1	0.140786	0.835015	0.975801	0.0241994
30 min	1919.05	20757.9	421.849	23098.8	0.0830803	0.898657	0.981737	0.0182628
45 min	1395.91	23574.6	182.778	25153.2	0.0554963	0.937237	0.992733	0.00726658
60 min	1838.5	23744.8	375.849	25959.1	0.0708228	0.914699	0.985521	0.0144785
Replication 2
Activity_D861A_WTS_15s-60m_5Mgcl2_rep2
	Nick intensity	Linear intensity	SC intensity	Total intensity	Nick	Linear	Nick+linear	SC
Control	2238.03	184.192	5694.02	8116.25	0.275747	0.0226942	0.298441	0.701559
15 sec	6690.05	1066.23	4756.49	12512.8	0.534658	0.0852116	0.619869	0.380131
30 sec	8921.42	1751.96	4671.78	15345.2	0.581383	0.11417	0.695553	0.304447
1 min	10053.2	3336.76	4014.18	17404.2	0.577634	0.191722	0.769356	0.230644
2.5 min	10294.8	8211.12	2052.26	20558.2	0.500765	0.399409	0.900173	0.0998265
5 min	8561.08	13423.6	1169.41	23154.1	0.369744	0.579751	0.949495	0.0505054
7.5 min	6805.83	15262.9	955.213	23023.9	0.295598	0.662914	0.958512	0.0414878
10 min	5339.47	16335	807.092	22481.6	0.237504	0.726596	0.9641	0.0359001
15 min	4306.47	16344.8	705.92	21357.2	0.20164	0.765307	0.966947	0.0330531
30 min	3276.35	17890.9	769.092	21936.3	0.149357	0.815582	0.96494	0.0350603
45 min	2657.64	18535	618.849	21811.5	0.121846	0.849782	0.971627	0.0283726
60 min	2915.81	18522.8	442.435	21881	0.133257	0.846522	0.97978	0.02022
Replication 3
Activity_D861A_WTS_15s-60m_5Mgcl2_rep3
	Nick intensity	Linear intensity	SC intensity	Total intensity	Nick	Linear	Nick+linear	SC
Control	4226.05	225.607	9619	14070.7	0.300345	0.0160339	0.316379	0.683621
15 sec	12430.9	1731.13	6660.63	20822.7	0.596989	0.083137	0.680126	0.319874
30 sec	12827.7	2356.15	5941.39	21125.3	0.607222	0.111532	0.718754	0.281246
1 min	14347.4	4774.25	4563.64	23685.3	0.605752	0.20157	0.807322	0.192678
2.5 min	13322	9562.56	2592.96	25477.5	0.522892	0.375334	0.898225	0.101775
5 min	9764.09	15105	1492.23	26361.4	0.370394	0.572999	0.943393	0.0566068
7.5 min	7659.22	17233	1057.99	25950.2	0.295151	0.664079	0.95923	0.04077
10 min	5631.49	17163.8	834.506	23629.7	0.238322	0.726362	0.964684	0.0353159
15 min	4806.2	18338.3	869.092	24013.6	0.200145	0.763664	0.963808	0.0361916
30 min	3637.83	20857.9	725.749	25221.5	0.144235	0.82699	0.971225	0.028775
45 min	3048.22	19931.6	657.506	23637.3	0.128958	0.843225	0.972184	0.0278165
60 min	2711.1	19099.3	378.849	22189.2	0.122181	0.860745	0.982926	0.0170736
				Time	Nick	Linear	Total activity
				0	0.263861	0.0162071	0.280068
				0.15	0.580459	0.0798356	0.660294
				0.3	0.588531	0.10047	0.689001
				1	0.600816	0.174025	0.774841
				2.5	0.520045	0.37839	0.898435
				5	0.36823	0.580115	0.948344
				7.5	0.27144	0.69098	0.96242
				10	0.231881	0.734458	0.966339
				20	0.180857	0.787995	0.968852
				30	0.125558	0.847076	0.972634
				45	0.1021	0.876748	0.978848
				60	0.108754	0.873989	0.982743
				STD
				Control	0.0436581	0.0064023	0.0481998
				15 sec	0.0401729	0.00758605	0.035011
				30 sec	0.0163355	0.0214857	0.0335138
				1 min	0.0211505	0.0394881	0.030115
				2.5 min	0.0180259	0.019669	0.00164363
				5 min	0.00320198	0.00730411	0.004488
				7.5 min	0.0414565	0.0476057	0.00615678
				10 min	0.0104565	0.0138214	0.00338507
				20 min	0.0347108	0.0407287	0.00621897
				30 min	0.0368755	0.0450328	0.0084869
				45 min	0.0405165	0.0524876	0.0120282
				60 min	0.0333128	0.0359658	0.00287517
				SEM
				Control	0.025206	0.00369637	0.0278281
				15 sec	0.0231938	0.00437981	0.0202136
				30 sec	0.00943132	0.0124048	0.0193492
				1 min	0.0122113	0.0227984	0.0173869
				2.5 min	0.0104073	0.0113559	0.000948947
				5 min	0.00184867	0.00421703	0.00259115
				7.5 min	0.0239349	0.0274852	0.00355462
				10 min	0.00603705	0.0079798	0.00195437
				20 min	0.0200403	0.0235147	0.00359052
				30 min	0.0212901	0.0259997	0.00489991
				45 min	0.0233922	0.0303037	0.00694451
				60 min	0.0192331	0.0207649	0.00165998

## Sheet: SpyCas9-N863A
Replication 1
Activity_N863A_WTS_15s-60m_5Mgcl2_rep1
	Nick intensity	Linear intensity	SC intensity	Total intensity	Nick	Linear	Nick+linear	SC
Control	3403.93	216.192	16134.6	19754.7	0.17231	0.0109438	0.183254	0.816746
15 sec	6778.73	214.263	13701.5	20694.5	0.327562	0.0103536	0.337916	0.662084
30 sec	8325.97	168.607	14332.5	22827.1	0.364741	0.00738628	0.372128	0.627872
1 min	10711.6	373.971	13711.4	24796.9	0.431973	0.0150813	0.447054	0.552946
2.5 min	13523.7	322.849	11104.5	24951.1	0.542009	0.0129393	0.554948	0.445052
5 min	17072.3	317.092	9000.82	26390.2	0.646917	0.0120155	0.658933	0.341067
7.5 min	20000.5	296.678	6548.97	26846.2	0.745005	0.011051	0.756056	0.243944
10 min	20459.9	255.849	4786.88	25502.6	0.802266	0.0100323	0.812298	0.187702
15 min	19708.3	227.092	3874.86	23810.3	0.827724	0.00953756	0.837261	0.162739
30 min	20439.3	428.971	3001.26	23869.5	0.856292	0.0179715	0.874264	0.125736
45 min	23681.5	407.749	2105.6	26194.9	0.904052	0.015566	0.919618	0.0803821
60 min	20414	512.042	1970.48	22896.5	0.891577	0.0223633	0.91394	0.08606
Replication 2
Activity_N863A_WTS_15s-60m_5Mgcl2_rep2
	Nick intensity	Linear intensity	SC intensity	Total intensity	Nick	Linear	Nick+linear	SC
Control	3791.3	268.192	10278.3	14337.8	0.264427	0.0187053	0.283132	0.716868
15 sec	6443.76	218.607	10107.6	16769.9	0.384245	0.0130356	0.39728	0.60272
30 sec	7819.71	232.021	10397.1	18448.8	0.423859	0.0125764	0.436435	0.563565
1 min	9886.08	182.192	8255.46	18323.7	0.539523	0.00994296	0.549466	0.450534
2.5 min	11896.9	185.021	5159.73	17241.6	0.690009	0.0107311	0.70074	0.29926
5 min	14477.1	201.435	3691.59	18370.1	0.788078	0.0109654	0.799044	0.200956
7.5 min	14790	139.021	3186.22	18115.2	0.816439	0.00767425	0.824114	0.175886
10 min	14358.7	153.435	2514.62	17026.8	0.843302	0.0090114	0.852314	0.147686
15 min	14506.2	163.021	1798.48	16467.7	0.880888	0.00989941	0.890788	0.109212
30 min	16387.2	202.849	1323.16	17913.2	0.914811	0.011324	0.926135	0.0738652
45 min	17985	196.263	1199.75	19381	0.92797	0.0101266	0.938097	0.0619034
60 min	17004.4	251.849	1116.92	18373.1	0.925502	0.0137075	0.939209	0.0607909
Replication 3
Activity_N863A_WTS_15s-60m_5Mgcl2_rep3
	Nick intensity	Linear intensity	SC intensity	Total intensity	Nick	Linear	Nick+linear	SC
Control	3802.52	334.092	9374.09	13510.7	0.281445	0.0247279	0.306173	0.693827
15 sec	5860.81	250.435	7954.44	14065.7	0.416674	0.0178047	0.434479	0.565521
30 sec	6569.64	193.607	8452.09	15215.3	0.431777	0.0127245	0.444502	0.555498
1 min	8120.18	204.021	8204.97	16529.2	0.491263	0.0123431	0.503606	0.496394
2.5 min	10244	397.799	6345.61	16987.4	0.603035	0.0234173	0.626452	0.373548
5 min	12784.7	256.435	4798.02	17839.1	0.716664	0.0143749	0.731039	0.268961
7.5 min	13532.7	260.607	3818.71	17612	0.768379	0.0147971	0.783176	0.216824
10 min	14714.5	277.021	2966.69	17958.2	0.819375	0.0154258	0.834801	0.165199
15 min	14687.6	279.435	1968.72	16935.8	0.867254	0.0164997	0.883754	0.116246
30 min	16264.3	423.678	1423.41	18111.4	0.898015	0.0233929	0.921408	0.0785917
45 min	17253	432.678	1224.16	18909.8	0.912382	0.0228811	0.935263	0.0647369
60 min	16298.2	518.749	870.92	17687.9	0.921434	0.029328	0.950762	0.0492383
				Time	Nick	Linear	Total activity
				0	0.239394	0.0181257	0.25752
				0.15	0.37616	0.0137313	0.389892
				0.3	0.406793	0.0108957	0.417688
				1	0.487587	0.0124558	0.500042
				2.5	0.611684	0.0156959	0.62738
				5	0.71722	0.0124519	0.729672
				7.5	0.776608	0.0111741	0.787782
				10	0.821648	0.0114898	0.833138
				20	0.858622	0.0119789	0.870601
				30	0.889706	0.0175628	0.907269
				45	0.914801	0.0161912	0.930993
				60	0.912837	0.0217996	0.934637
				STD
				Control	0.0587163	0.00691032	0.0653398
				15 sec	0.0451027	0.00377392	0.0487037
				30 sec	0.036632	0.00304017	0.0396623
				1 min	0.0538693	0.00257104	0.0512988
				2.5 min	0.074378	0.00677748	0.0729002
				5 min	0.0705821	0.00174614	0.0700654
				7.5 min	0.0364214	0.00356302	0.034262
				10 min	0.0206124	0.00344668	0.0200595
				20 min	0.0276136	0.00391931	0.0290866
				30 min	0.0301311	0.00604482	0.0286807
				45 min	0.0121412	0.00640023	0.00995208
				60 min	0.0185243	0.00782549	0.0188319
				SEM
				Control	0.0338999	0.00398968	0.037724
				15 sec	0.0260401	0.00217888	0.0281191
				30 sec	0.0211495	0.00175525	0.022899
				1 min	0.0311014	0.00148439	0.0296174
				2.5 min	0.0429422	0.00391298	0.042089
				5 min	0.0407506	0.00100813	0.0404523
				7.5 min	0.0210279	0.00205711	0.0197812
				10 min	0.0119005	0.00198994	0.0115814
				20 min	0.0159427	0.00226282	0.0167931
				30 min	0.0173962	0.00348998	0.0165588
				45 min	0.00700973	0.00369517	0.00574584
				60 min	0.010695	0.00451805	0.0108726
